# Supplementary material for: Electrochemical synthesis of luminescent MoS2 quantum dots
Source: Royal Society of Chemistry journal article supplement (doi:10.1039/c4cc09826a), 2015-01-01
Supplement: c4cc09826a1.pdf [file c4cc09826a1.pdf]

## Electronic Supplementary Information

### **Electrochemical Synthesis of Luminescent MoS<sub>2</sub> Quantum Dots**

Deepesh Gopalakrishnan,<sup>a†</sup> Dijo Damien,<sup>a†</sup> Bo Li,<sup>b</sup> Hemtej Gullappalli,<sup>b</sup> Vijayamohanan K. Pillai,<sup>c</sup>  
Pulickel M. Ajayan<sup>b</sup> and Manikoth M. Shaijumon<sup>\*a</sup>

#### **Experimental Methods:**

**1. Synthesis of MoS<sub>2</sub> quantum dots through electrochemical exfoliation.** MoS<sub>2</sub> quantum dots were synthesized through an electrochemical route. MoS<sub>2</sub> flakes, Ionic Liquids such as Bis (trifluoromethane)sulfonimide lithium (LiTFSI) salt, 1-Butyl-3-methylimidazolium chloride ([BMIM]Cl) from Sigma Aldrich, were used as received. In a typical experiment, MoS<sub>2</sub> discs (diameter 1cm) made from commercially available MoS<sub>2</sub> powder flakes, were placed in an electrochemical cell 1 cm apart, in aq. Lithium bis(trifluorosulfon)imide (LiTFSI) or 1-Butyl-3-methylimidazolium chloride ([BMIm]Cl) of various concentrations viz. 0.1, 1 and 5 wt.%. A constant DC potential of 5 V is applied between the MoS<sub>2</sub> discs at room temperature. The reaction mixture was collected after 3 h and centrifuged using vivaspin centrifugal concentrators at 6000 rpm for 1 h to remove any traces of bulk MoS<sub>2</sub>.

**2. Structural characterizations and Electrochemical HER measurements of MoS<sub>2</sub> quantum dots.** The structure and composition of the exfoliated MoS<sub>2</sub> QDs were characterized using various microscopic and spectroscopic tools including high resolution transmission electron microscope (HRTEM), Atomic force microscope (AFM), X- ray photoelectron spectrometer (XPS), UV- Vis photo-spectrometer, and Fluorescence spectrometer. HRTEM images of MoS<sub>2</sub> QDs of varying sizes were obtained using JEOL JEM 2100 (200 kV) with a LaB<sub>6</sub> electron gun and JEOL 2100 Field Emission Gun Transmission Electron Microscope. AFM images were taken using Bruker Multimode 8. XPS measurements were carried out using

PHI Quantera XPS. Shimadzu UV- 3600 UV- Vis spectrometer was used to collect the absorption spectra of the synthesized MoS<sub>2</sub> QDs. Photoluminescence emission spectra were recorded on spectro-fluorimeter (Horiba JobinYvon- Fluorolog 3).

**Electrochemical measurements.** The electrocatalytic performance of MoS<sub>2</sub> QDs towards the Hydrogen evolution reaction (HER) was evaluated using a three electrode system with 0.5M H<sub>2</sub>SO<sub>4</sub> as electrolyte. As synthesized MoS<sub>2</sub> QDs with 5 wt% nafion solution were drop-casted onto a freshly polished glassy carbon (GC) electrode and dried at room temperature, which acts as the working electrode. A Pt wire auxiliary electrode and a Ag/AgCl were used as counter and reference electrodes respectively. The performance of the catalyst towards hydrogen evolution was measured using linear sweep voltammetry by applying a potential ranging from +0.2V to -0.45V vs. standard hydrogen electrode (SHE) with a very slow scan rate of 2 mVs<sup>-1</sup>.

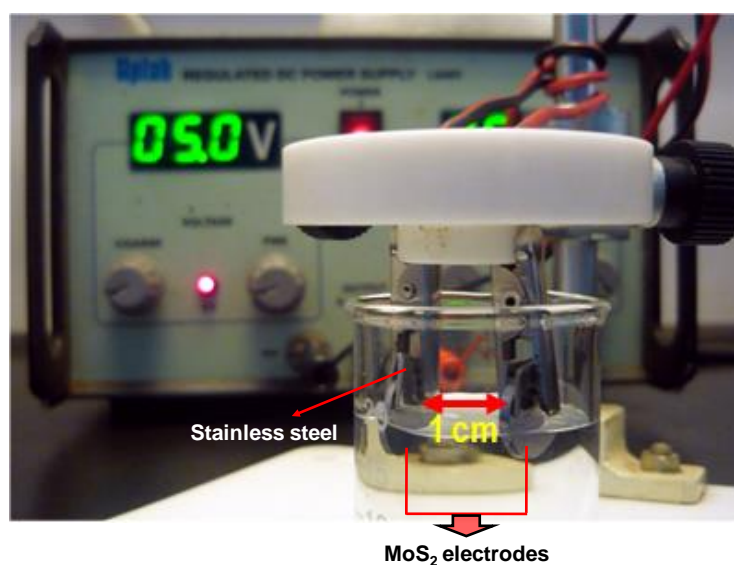

**Fig. S1** Experimental set up for the electrochemical exfoliation of MoS<sub>2</sub> nanoclusters.

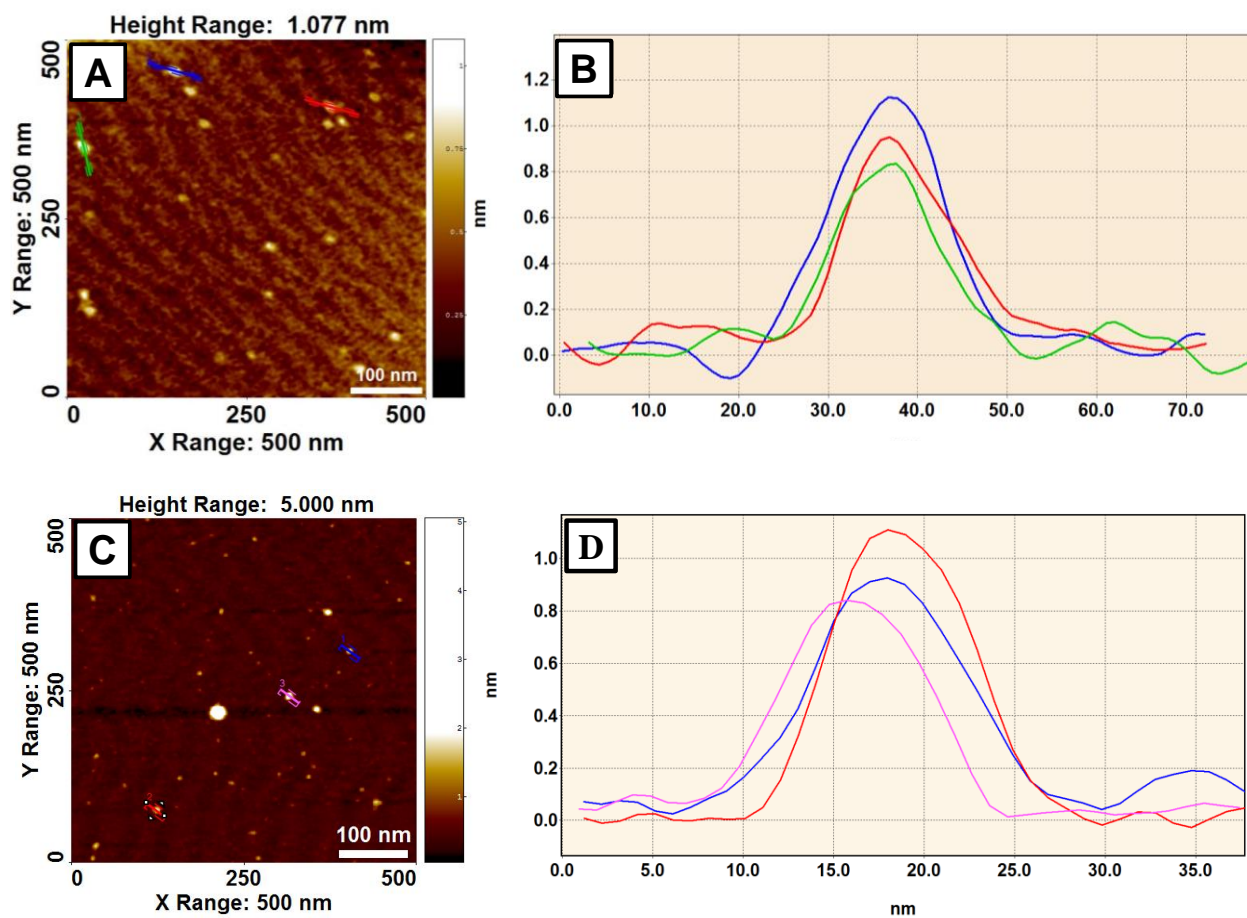

**Fig. S2.** Electron AFM images of electrochemically exfoliated MoS<sub>2</sub> QDs. AFM analyses show particles with uniform thickness distribution for all the samples. (A) and (B), respectively, show AFM images and corresponding height profile of MoS<sub>2</sub> QDs synthesized using aq. [BMIm]Cl electrolyte with 0.1 wt%. (C, D), respectively, show AFM images and height profile of similar particles obtained with 1.0 wt% concentration of aq. [BMIm]Cl electrolyte.

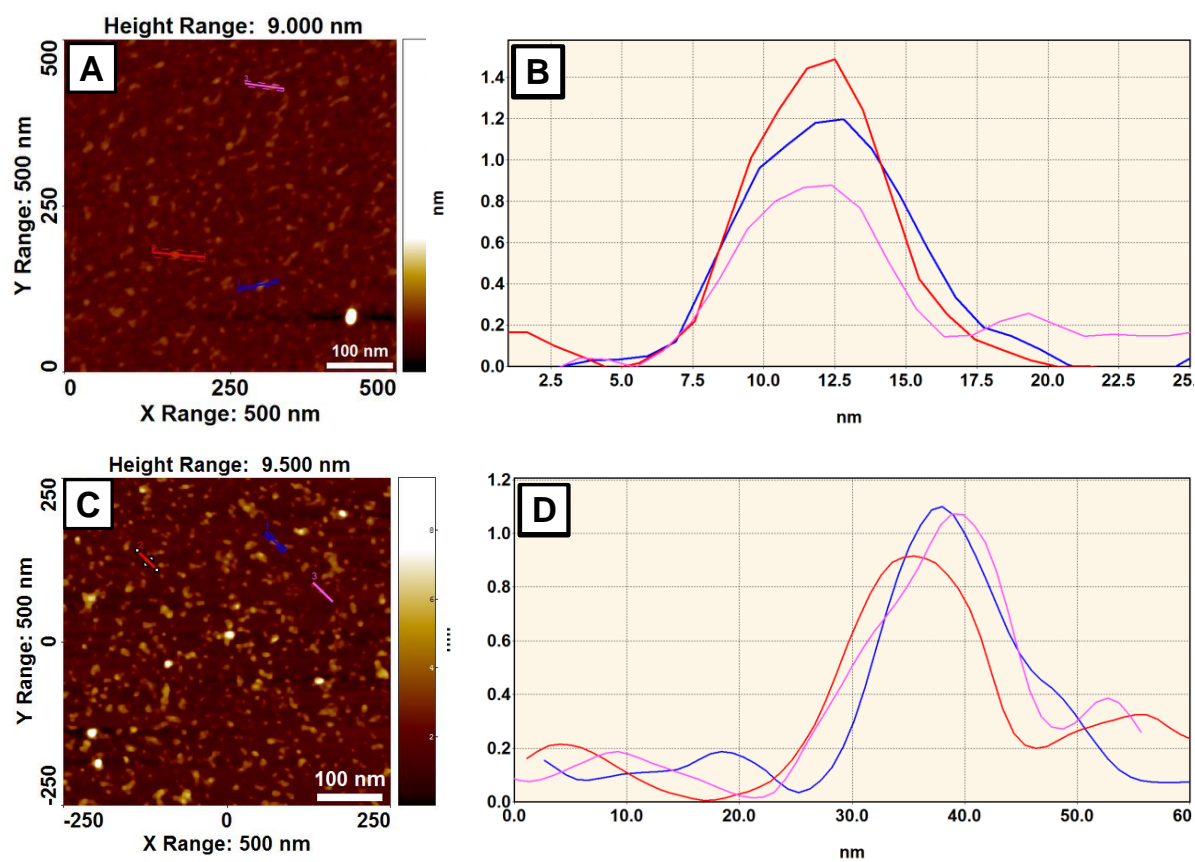

**Fig. S3** AFM image of the MoS<sub>2</sub> clusters formed using LiTFSI 0.1 wt. % (A) and its corresponding height profile (B). C and D correspond to the AFM image and height profile of MoS<sub>2</sub> clusters respectively, obtained using 1wt. % aq. LiTFSI electrolyte.

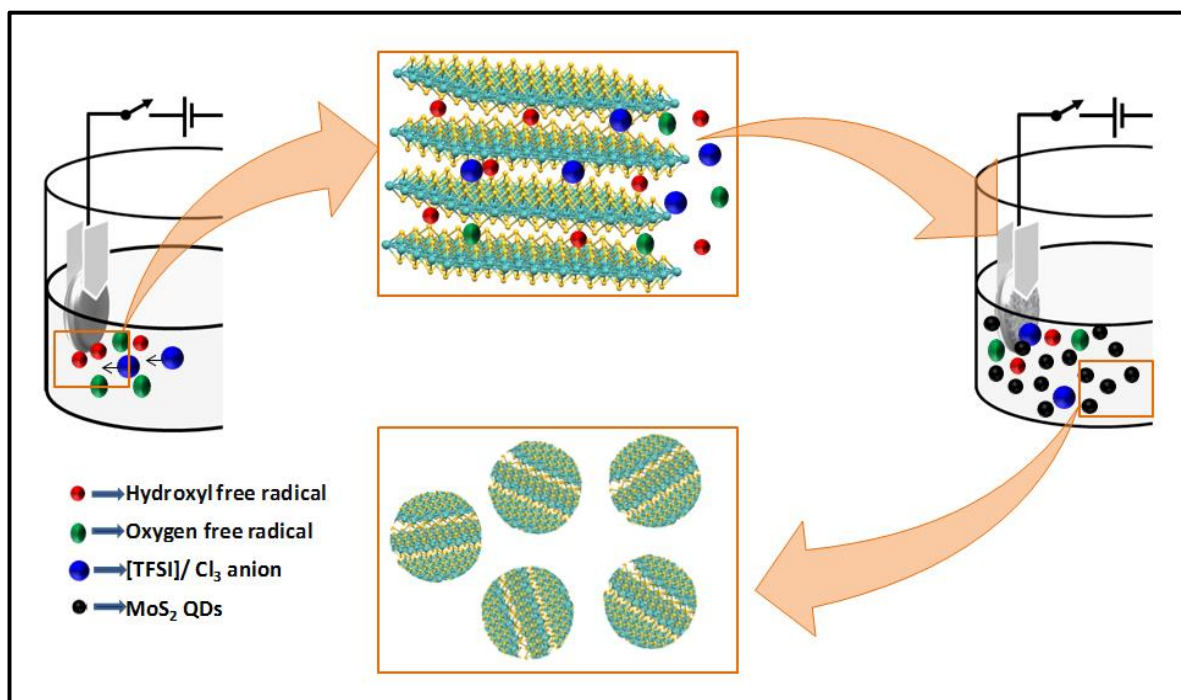

**Fig. S4.** A schematic representation of the electrochemical exfoliation of MoS<sub>2</sub> pellets in LiTFSI/[BMIm]Cl based aq. Electrolyte. Hydroxyl and oxygen free radicals generated under the applied DC voltage trigger the initial cleavage of MoS<sub>2</sub> sheets. As the time progresses, the MoS<sub>2</sub> anode swells by the incorporation of TFSI<sup>-</sup> anions and MoS<sub>2</sub> QDs start dissolving in the electrolyte [Sizes mentioned are not to the scale].

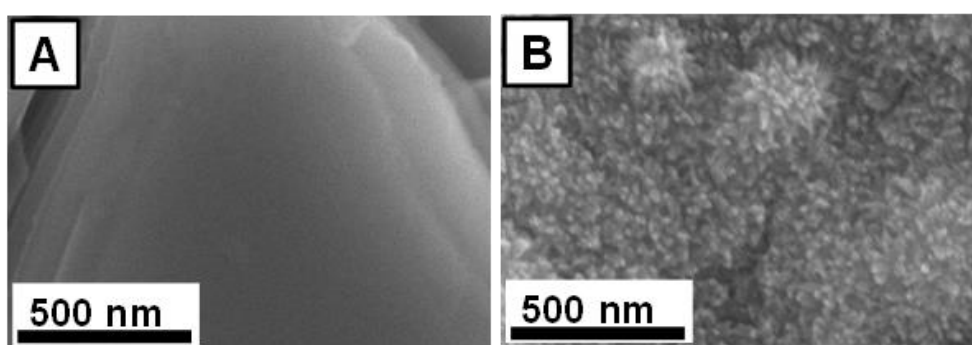

**Fig. S5** SEM images of the bulk MoS<sub>2</sub> anode surface before the electrochemical exfoliation and after the electrochemical exfoliation. Surface roughening results from the etching of MoS<sub>2</sub> nanoclusters from the surface of the anode.

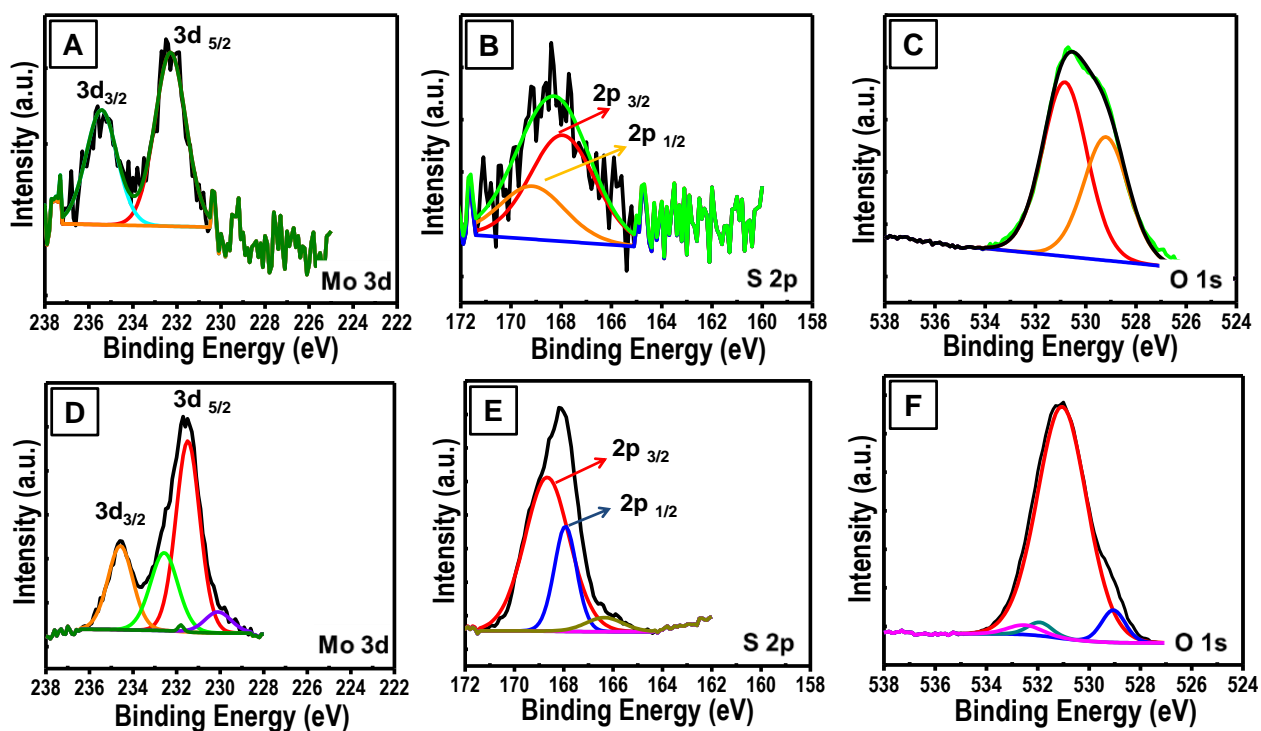

**Fig. S6** The XPS spectrum of MoS<sub>2</sub> QDs synthesized using [BMIm] Cl 1 wt% (A, B & C) and LiTFSI 1 wt% (D, E & F) at a potential 5V. Slightly oxidized nature of Mo 3d (D); existence of S-O bond of S 2p (E) and O 1s (F).

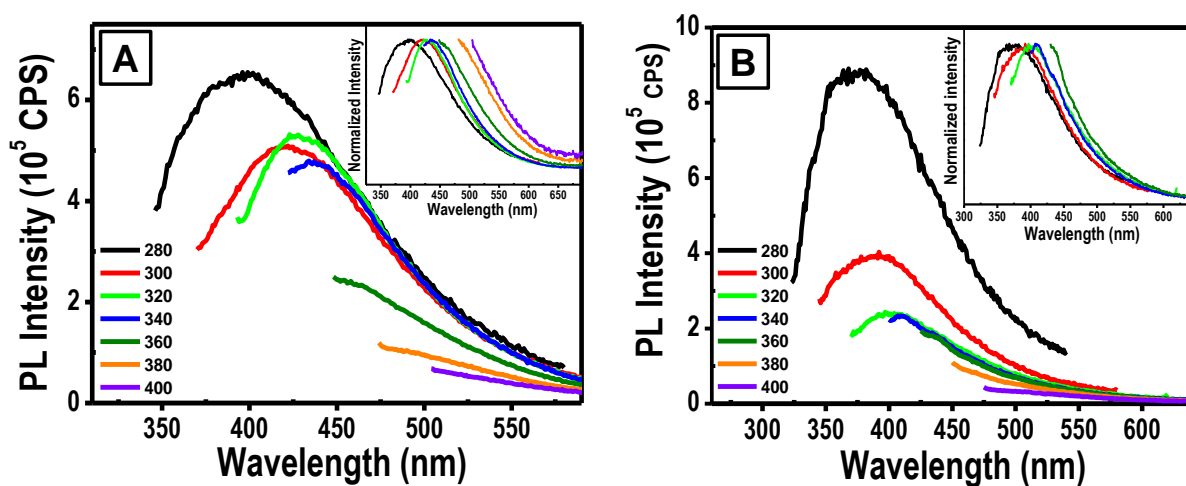

**Fig. S7** A and B show photoluminescence spectra of MoS<sub>2</sub> QDs obtained at an applied DC voltage of 5 V with 0.1 wt% and 1 wt% concentration of [BMIm]Cl. Excitation wavelengths are varied and normalized excitation dependent emission spectra are shown in the corresponding inset.

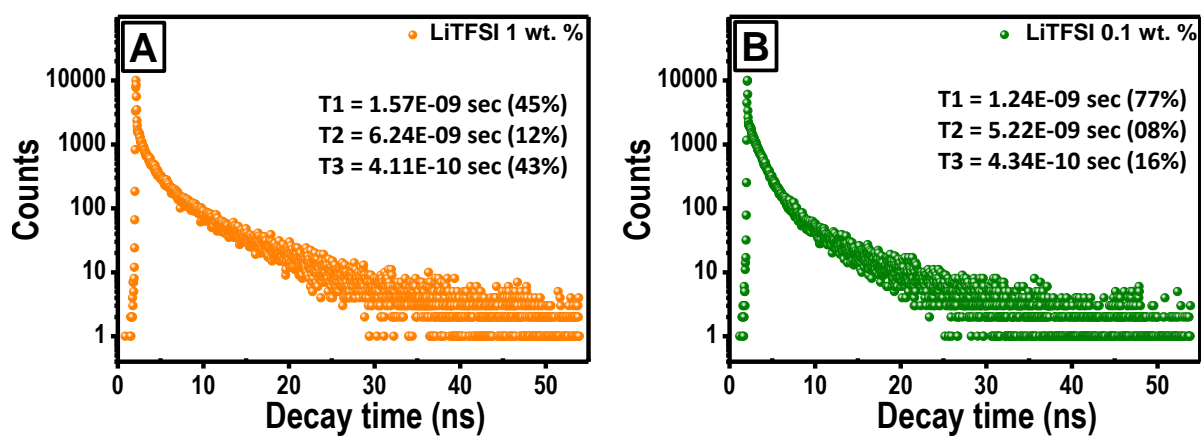

**Fig. S8** Time resolved Photoluminescence of MoS<sub>2</sub> QDs synthesized using aq. LiTFSI electrolytes of concentration 1.0 (A) and 0.1 wt. % (B) measured at room temperature.



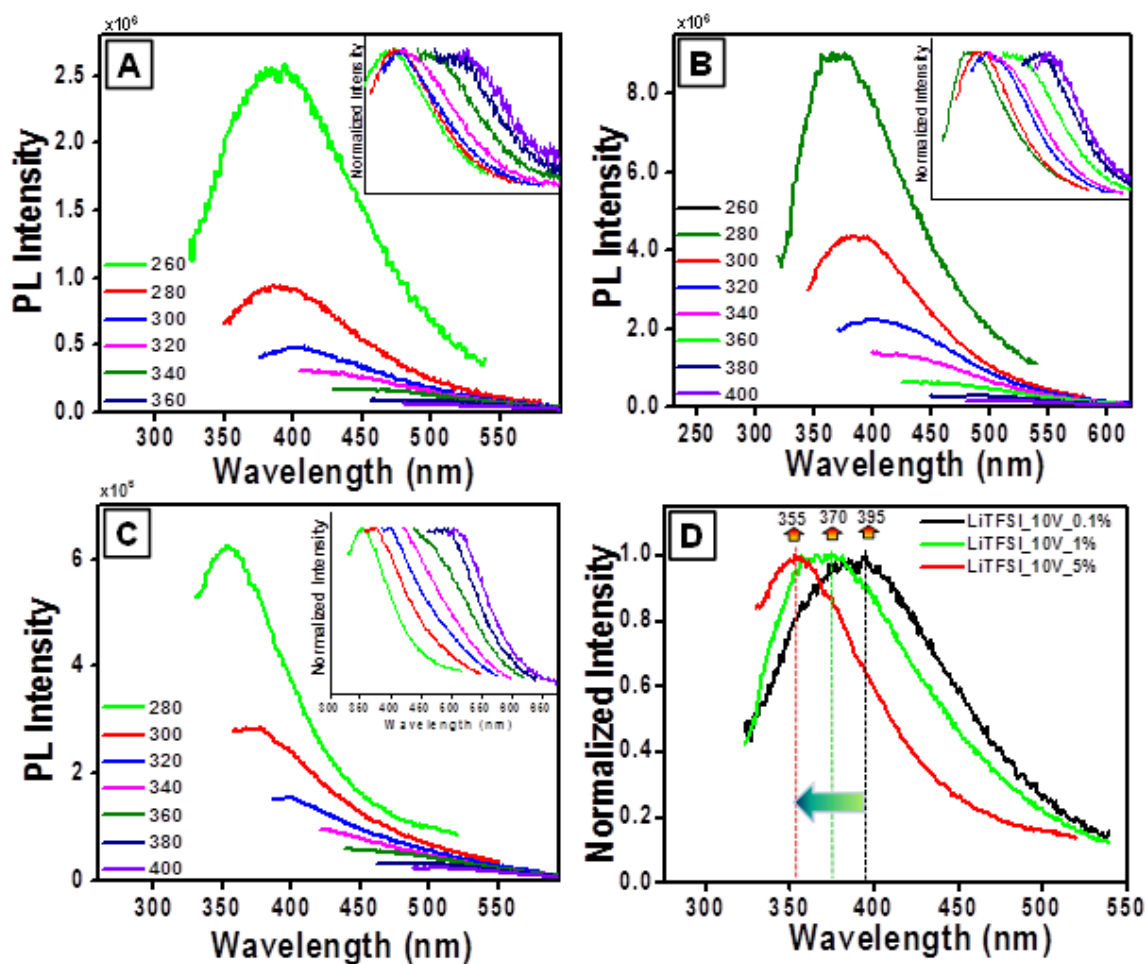

**Fig. S9.** Excitation dependent photoluminescence spectra of MoS<sub>2</sub> QDs synthesised by electrochemical exfoliation of bulk MoS<sub>2</sub> electrodes in aq. LiTFSI of various concentrations *viz.*, 0.1, 1.0 and 5 wt% at 10V are shown in A, B and C respectively. D shows the comparison of the normalized photoluminescence spectrum of MoS<sub>2</sub> QDs obtained at an applied potential of 10V at various concentration *viz.* 0.1, 1 and 5 wt. %.
